# Supplementary material
Source: publisher site journal article supplement (https://www.spandidos-publications.com/5262/downloadSupplementary)

Figure S1. Targets of dioscin action on renal fibrosis by network pharmacology.

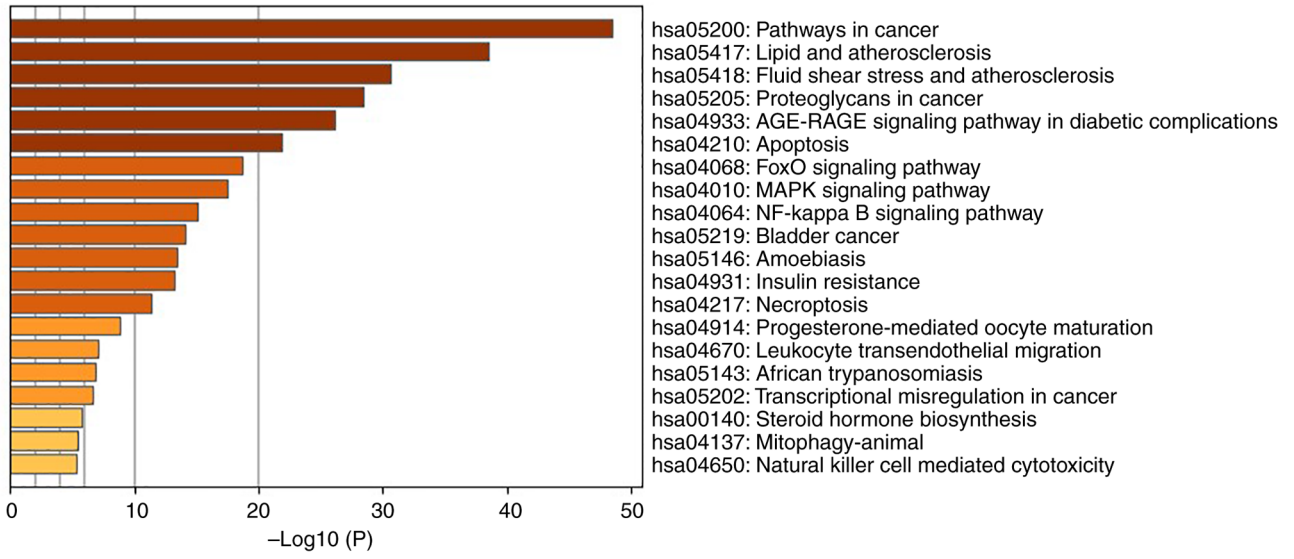

Figure S2. The ratio of UACR. Data represented the mean  $\pm$  standard error of the mean (n=3). UACR, urine protein and urine creatinine; UUO, unilateral ureteral obstruction.

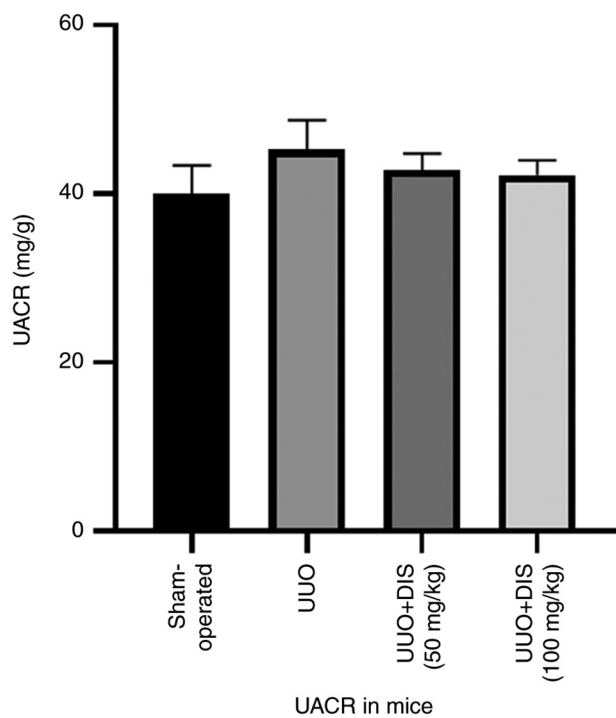

Supplement: Supplementary file 1 [file downloadSupplementary]
